# Supplementary material
Source: PubMed Central journal article supplement (PMC4027388)
Supplement: rspb20132688supp2.pdf [file rspb20132688supp2.pdf]

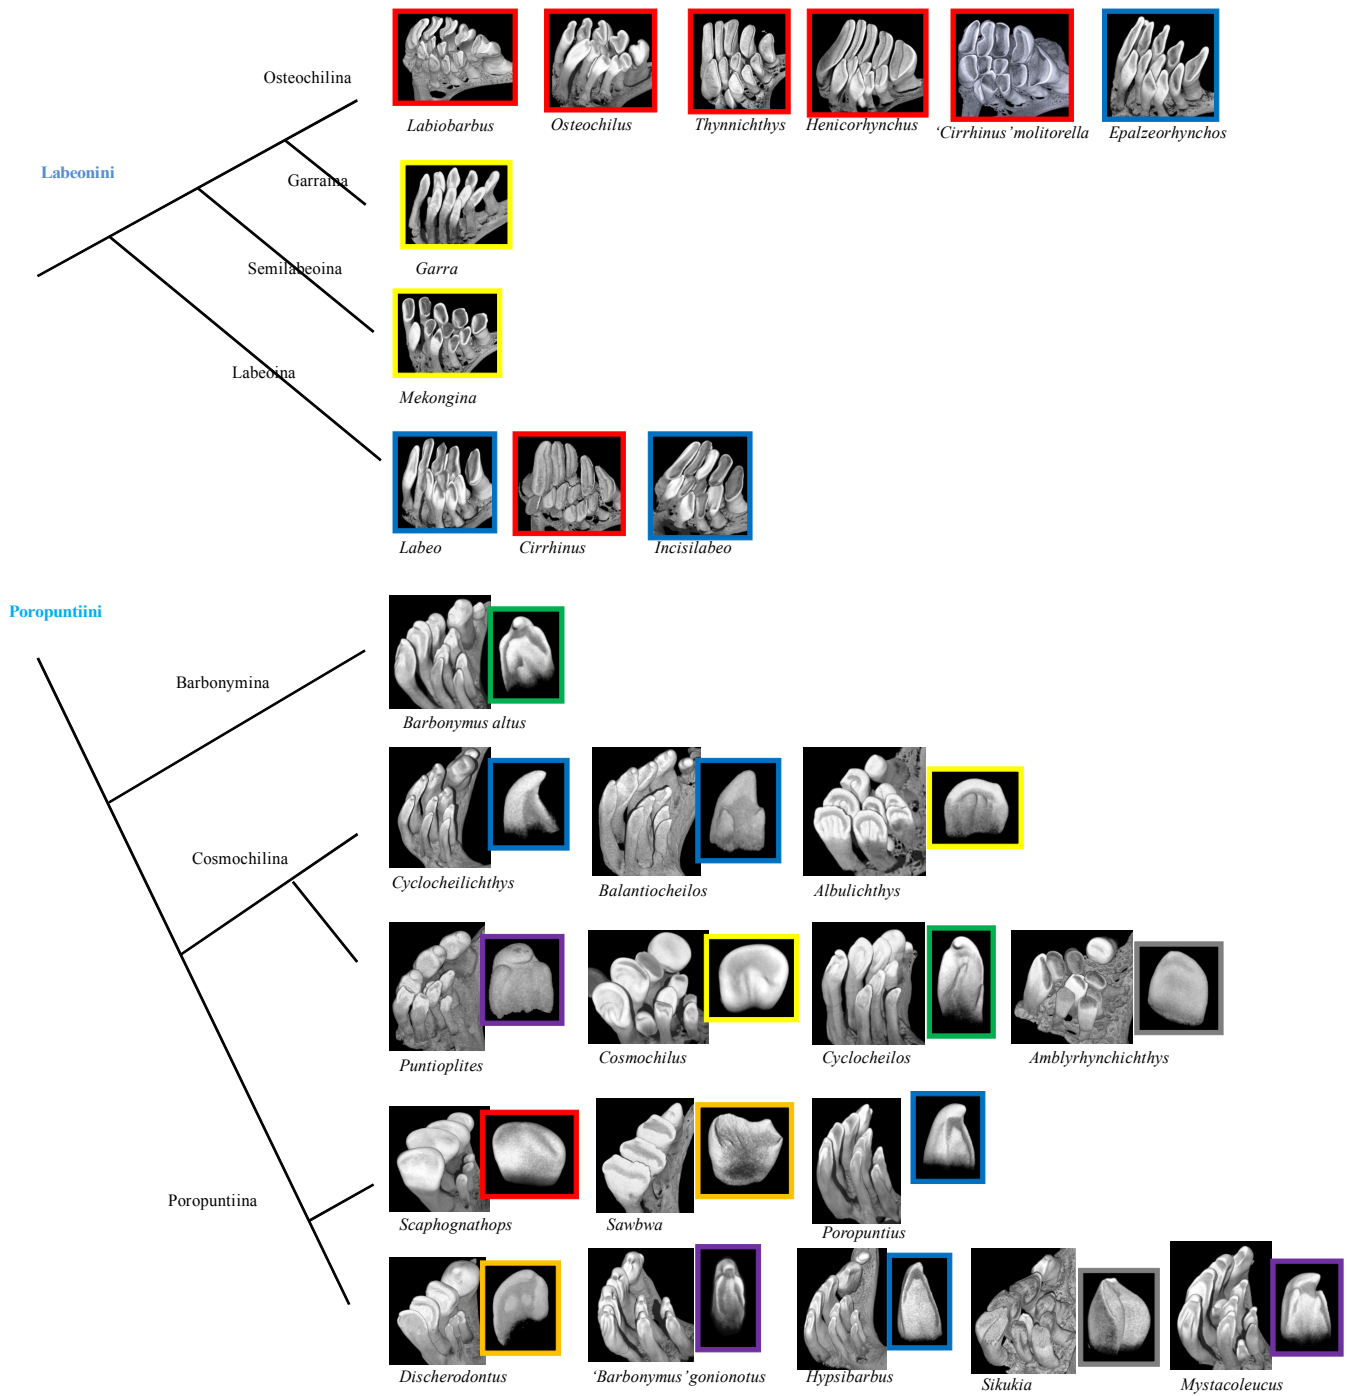

Figure S5: Evolution of pharyngeal dentition in Labeonini and Poropuntiini

Tooth number and shape in Labeonini and Poropuntiini was investigated through microtomography. Images are mapped on a simplified phylogeny, splitting Labeonini into four sub-tribes and Poropuntiini into three sub-tribes. For Poropuntiini, a replacing tooth is also provided for the accurate visualization of tooth shape. Colors for each genus correspond to tooth shape categories shown in Figure 3.
